# Supplementary material
Source: PubMed Central journal article supplement (PMC4251952)
Supplement: NIHMS59825-supplement-01.pdf [file NIHMS59825-supplement-01.pdf]

| primers         |                                                     | Template         |               | ERp44                          |
|-----------------|-----------------------------------------------------|------------------|---------------|--------------------------------|
| FW              | CACCGCTAGCGAAATAACAAGTCTTGATACAGAGAAT               | pET28            | PCR cloning   | ERp44 ΔHis                     |
| RV              | GCGCCTCGAGTTAATCCCTCAATAGAGTATACCTATAT              |                  |               |                                |
| FW              | GCGCGGGATCCGGTAGTCCTGAGAGAGCTCCTTC                  | pcDNA ERp44 wt   | cut and paste | ERp44 ΔHis                     |
| RV              | GCGCGGATCCAGAATGTAAGTCAAATACGAA                     |                  |               |                                |
| FW <sub>1</sub> | CAACTCGAGCGTTACCATGCATCCTGCC                        |                  |               |                                |
| RV <sub>1</sub> | GCGGCGGTACCTTAAAGCTCATCTCGATCCCTC                   |                  |               |                                |
| FW              | ATCGCTATTGACAGCTTTAGAGCTATGTATGTGTTGGAG             | pcDNA ERp44 wt   | SDM           | ERp44 A (H299A)                |
| RV              | CTCCAAACACATACATAGCTCTAAAGCTGTCAATAGCGAT            |                  |               |                                |
| FW              | GACTTACATTCTGGAAAACCTGGCCAGAGAATCCATCATGGAC         | pcDNA ERp44 wt   | SDM           | ERp44 B (H328A)                |
| RV              | GTCCATGATGGAATTCTCTGGCCAGTTTTCCAGAATGTAAGTC         |                  |               |                                |
| FW              | CACAGAGAATTCGCTCATGGACCTGAC                         | pcDNA ERp44 wt   | SDM           | ERp44 C (H332)                 |
| RV              | GTCAGGTCCATGAGCGAATTCTCTGTG                         |                  |               |                                |
| FW              | CTGCACAGAGAATTCATGCTGGACCTGACCCAATGAT               | pcDNA ERp44 wt   | SDM           | ERp44 D (H333A)                |
| RV              | ATCAGTTGGGTCAGGTCCAGCATGGAATTCTCTGTGCAG             |                  |               |                                |
| FW              | AAACTGGCCAGAGAATTCGCTCATGGACCTGACCCAAT              | pcDNA ERp44 B    | SDM           | ERp44 BC (H328-332A)           |
| RV              | AGTTGGGTCAGGTCCATGAGCGAATTCTCTGGCCAGTTT             |                  |               |                                |
| FW              | CTGGAAAACCTGCACAGAGAATTCGCTGCTGGACCTGACCCAATGATACAG | pcDNA ERp44 wt   | SDM           | ERp44 CD (H332-333A)           |
| RV              | CTGTATCAGTTGGGTCAGGTCCAGCAGCGAATTCCTGTGCAGTTTTCCAG  |                  |               |                                |
| FW              | CTGGCCAGAGAATTCATGCTGGACCTGACCCAATGAT               | pcDNA ERp44 B    | SDM           | ERp44 BD (H328-333A)           |
| RV              | ATCAGTTGGGTCAGGTCCAGCATGGAATTCTCTGGCCAG             |                  |               |                                |
| FW              | GACTTACATTCTGGAAAACCTGGCCAGAGAATCCATCATGGAC         | pcDNA ERp44 CD   | SDM           | ERp44 BCD (H328-332-333A)      |
| RV              | GTCCATGATGGAATTCTCTGGCCAGTTTTCCAGAATGTAAGTC         |                  |               |                                |
| FW              | ATCGCTATTGACAGCTTTAGAGCTATGTATGTGTTGGAG             | pcDNA ERp44 BCD  | SDM           | ERp44 ABCD (H299 328-332-333A) |
| RV              | CTCCAAACACATACATAGCTCTAAAGCTGTCAATAGCGAT            |                  |               |                                |
| FW              | GCTGCTGGACCTGACCCAGCTGATACAGCCCCAGGAGAG             | pcDNA ERp44 ABCD | SDM           | ERp44 ABCD/T338A               |
| RV              | CTCTCCTGGGGCTGTATCAGCTGGGTCAGGTCCAGCAGC             |                  |               |                                |

**Supplemental Table2** List of the primers and methods (SDM, side directed mutagenesis; PCR, polymerase chain reaction) employed to generate ERp44 mutants used in all main text figures.
