# Supplementary material
Source: PubMed Central journal article supplement (PMC4251952)
Supplement: NIHMS59825-supplement-Fig_S1.pdf [file NIHMS59825-supplement-Fig_S1.pdf]

## Schematic representation of the ERp44 mutants used in this study



The red rectangle at N-terminus represents the tag (HA or Halo), placed immediately after the signal sequence. The signal sequence, tag and RDEL motif are absent in the vectors used for E.coli expression. Black stars indicate point mutations. The ΔHis mutant was generated by replacing the 25 residues of the His loop (326-350) with a short spacer (SGSG, light blue rectangle).
