# Supplementary material
Source: PubMed Central journal article supplement (PMC4251952)
Supplement: NIHMS59825-supplement-Fig_S2.pdf [file NIHMS59825-supplement-Fig_S2.pdf]

A

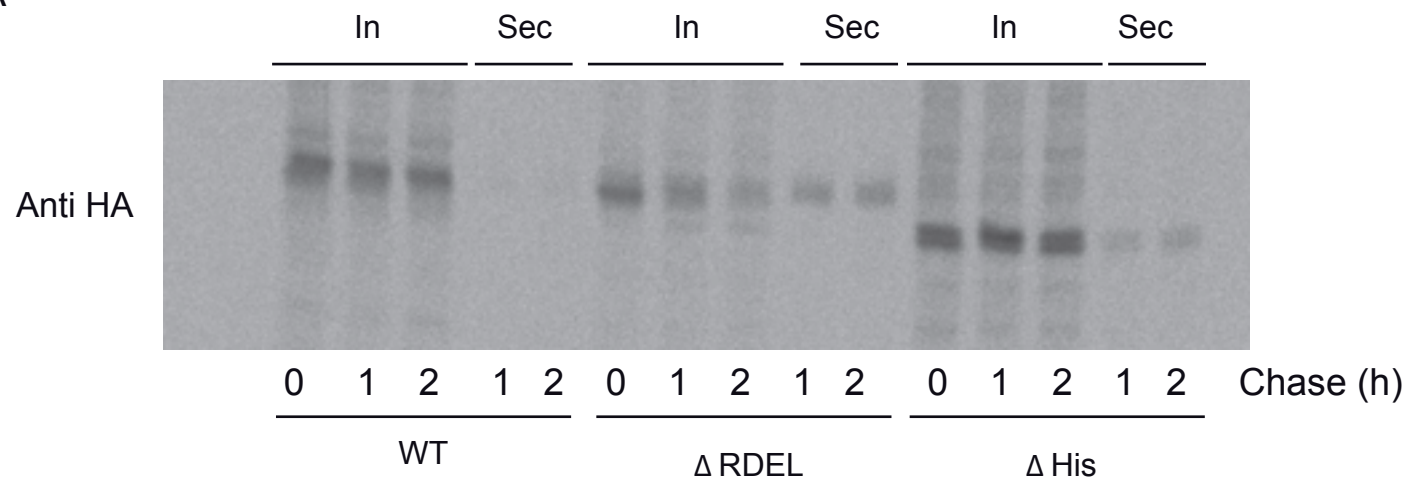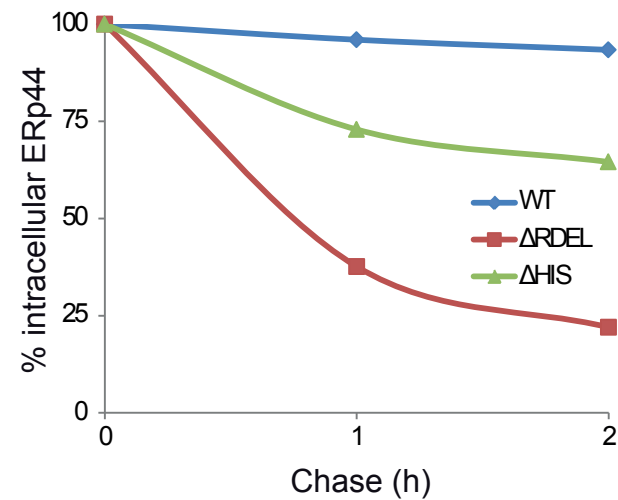

B

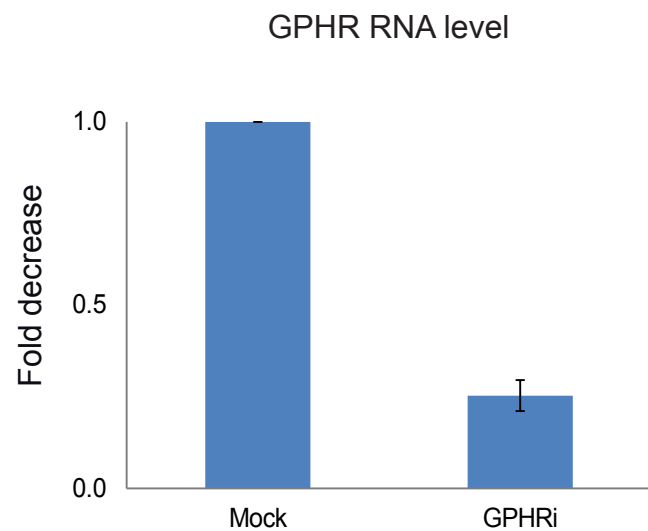

A. *ERp44  $\Delta$ His is secreted.* HeLa transfectants were pulsed with radiolabeled amino acids and chased in cold medium. At the indicated times, aliquots from the lysates (In) and supernatants (Sec) were immunoprecipitated with anti-HA antibody and analyzed by gel electrophoresis. Intracellular ERp44 levels were quantified and the values depicted in the graph shown on the right. While the intracellular pool of  $\Delta$ His decreases, the total HA signal (In plus Sec) remain rather constant, indicating that the mutant is not degraded to a significant extent.

B. *GP1HR silencing.* The efficiency of silencing was verified by RealTime PCR. The average of five experiments are represented in the graph with SEM.
