# Supplementary material
Source: PubMed Central journal article supplement (PMC4251952)
Supplement: NIHMS59825-supplement-Fig_S3.pdf [file NIHMS59825-supplement-Fig_S3.pdf]

A

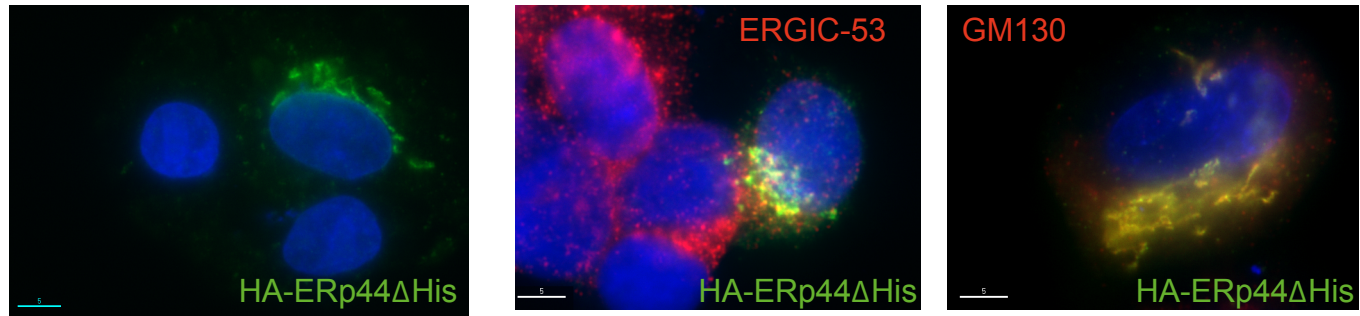

B

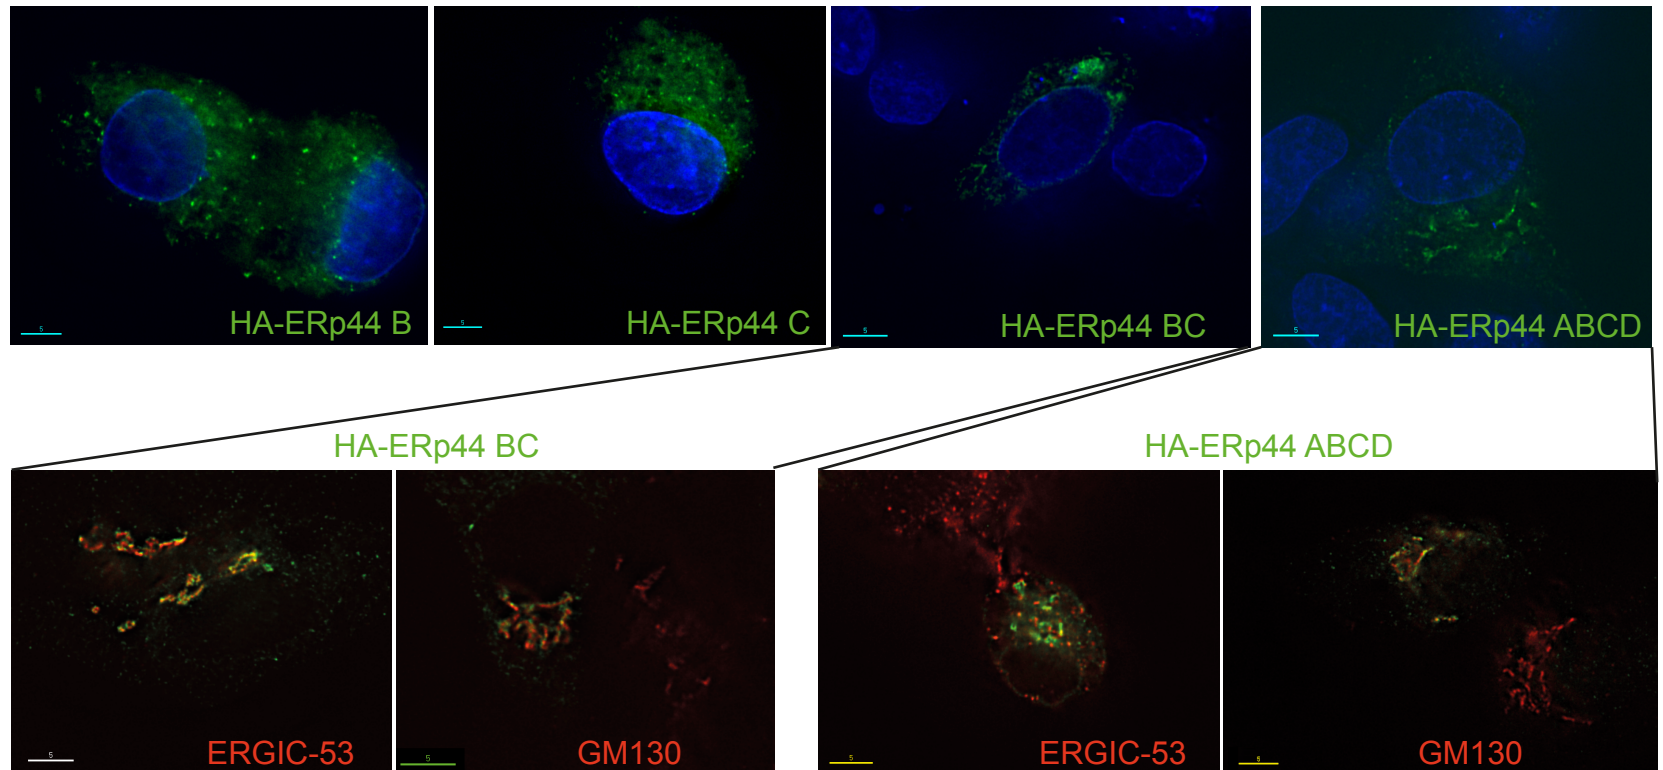

Localization of HA-tagged ERp44 mutants. HepG2 transfectants expressing HA-ERp44  $\Delta$ His (A) or different histidine mutants (B) were decorated with anti-HA (green signal) and with different ESC markers (in red, either ERGIC-53 or GM130).  $\Delta$ His and ABCD colocalize mainly with GM130 and partially with ERGIC-53, whilst BC colocalizes preferentially with ERGIC-53.
